# Supplementary material for: Therapeutic shutdown of HBV transcripts promotes reappearance of the SMC5/6 complex and silencing of the viral genome in vivo
Source: HighWire-hosted journal article supplement (doi:10.1136/gutjnl-2020-322571), 2021-01-28
Supplement: gutjnl-2020-322571supp001_data_supplement.pdf [file gutjnl-2020-322571supp001_data_supplement.pdf]

## **Supplementary Material**

### **Therapeutic shutdown of hepatitis B virus transcripts promotes reappearance of the SMC5/6 complex and silencing of the viral genome in vivo**

Lena Allweiss<sup>1#</sup>, Katja Giersch<sup>1#</sup>, Andrea Piroso<sup>1</sup>, Tassilo Volz<sup>1,2</sup>, Robert C. Muench<sup>3</sup>, Rudolf K. Beran<sup>3</sup>, Stephan Urban<sup>4,2</sup>, Hassan Javanbakht<sup>5</sup>, Simon P. Fletcher<sup>3</sup>, Marc Lütgehetmann<sup>2,6</sup>, Maura Dandri<sup>1,2\*</sup>

# These authors contributed equally to this work.

1. I. Department of Internal Medicine, University Medical Center Hamburg-Eppendorf, Hamburg, Germany
2. German Center for Infection Research (DZIF), Hamburg-Lübeck-Borstel-Riems and Heidelberg sites, Germany
3. Gilead Sciences, Foster City, California, United States of America
4. Department of Infectious Diseases, Molecular Virology, University Hospital Heidelberg, Heidelberg, Germany
5. Present address: SQZ Biotechnologies, Watertown, Massachusetts, United States of America
6. Institute of Microbiology, Virology and Hygiene, University Medical Center Hamburg-Eppendorf, Hamburg, Germany

### **Supplementary methods**

**Generation of USG mice.** All animal experiments were performed in accordance with the European Union directive 2010/63/EU and approved by the ethical committee of the city and state of Hamburg in accordance with the ARRIVE guidelines. Animals were maintained under specific pathogen-free conditions in accordance with institutional guidelines under approved protocols. One million thawed human hepatocytes were injected intrasplenically into 3-week-old homozygous mice anesthetized with isoflurane. After eight weeks, the levels of human chimerism were determined by measuring human serum albumin in mouse serum with the Human Albumin ELISA kit (Immunology Consultants Lab, Portland, USA). HBV infection was established upon a single intraperitoneal injection of HBV-containing mouse serum ( $1 \times 10^7$  HBV DNA copies/mouse, genotype D, HBeAg-positive). Blood samples were taken retro-orbitally

38 during the experiments. Liver specimens removed at the time of sacrifice were snap-frozen in  
39 2-methylbutane and stored at -80°C for histological and molecular analyses.

40

41 **Virological measurements.** Viral DNA was extracted from serum samples using the QiAamp  
42 MinElute Virus Spin Kit (Qiagen, Hilden, Germany). QPCR measurements were performed on  
43 the ViiA 7 Real-Time PCR System with probes and primers from the TaqMan® Gene  
44 Expression Assay System and the Taqman® Fast Advanced Master Mix (Thermo Fisher,  
45 Waltham, Massachusetts, USA)(1). Viral titers in the serum were quantified with HBV-specific  
46 primers and probes (TaqMan® Gene Expression assay ID: Pa03453406\_s1) while known  
47 references of an HBV DNA plasmid were amplified to establish a standard curve for absolute  
48 quantification. HBsAg and HBeAg quantification were performed on the Abbott Alinity I  
49 platforms (quantitative HBsAg kit, and HBeAg kit, Abbott, Ireland, Diagnostic Division) after  
50 diluting the mouse serum 1:200 in the dilution serum (Abbott) as recommended by  
51 manufacturer. DNA and RNA were extracted from liver specimens using the Master Pure DNA  
52 purification kit (Epicentre, Madison, USA) and the RNeasy Mini Kit (Qiagen), respectively.  
53 Intrahepatic HBV DNA was quantified with the same primer and probe set used for serum. For  
54 normalization, the number of human hepatocytes was estimated by measuring human  
55 hemoglobin beta (assay ID Hs00758889\_s1) while human genomic DNA (Roche Applied  
56 Science, Mannheim, Germany) was used in a standard curve for quantification. Intrahepatic  
57 HBV RNA levels were determined in a one-step qRT-PCR using the TaqMan® Fast Virus 1-  
58 Step Master Mix as recommended by the manufacturer (Thermo Fisher). The same HBV-  
59 specific primer and probe set used for serum amplified intrahepatic total HBV RNA.  
60 Pregenomic HBV RNA (including precore HBV RNA) was amplified as described elsewhere(2).  
61 The expression of two human housekeeping genes (GAPDH; glyceraldehyde-3-phosphate  
62 dehydrogenase, assay ID Hs99999905\_m1, and RPL30; ribosomal protein L30,  
63 Hs00265497\_m1) was used for normalization. All intrahepatic measurements were performed  
64 on three different liver pieces isolated per mouse.

65

66 **cccDNA quantification.** For Southern blot analysis, DNA was extracted with a modified  
67 protocol using the Master Pure DNA purification kit without the proteinase K digestion step.  
68 Omitting the protein digestion results in reduced precipitation of protein-bound DNA and  
69 subsequently lower levels of rcDNA compared to the classical extraction with proteinase K. To  
70 further reduce non-cccDNA HBV DNA forms, which might give rise to background staining on  
71 the blot, all samples were digested with plasmid-safe ATP-dependent DNase (Epicentre) using  
72 the following conditions: 1 µg total DNA was incubated with 30 U of enzyme at 37°C in a total  
73 volume of 200 µl for 2 h. After heat inactivation (30 min at 70°C), the DNA was purified using  
74 the DNA clean and concentrator kit (Zymo Research, Irvine, California, USA). Before loading,

75 a small part of every sample was set aside, diluted and used for cccDNA PCR for a direct  
76 comparison of qPCR and Southern blot quantification. qPCR with cccDNA-selective TaqMan  
77 primers and probe(2) was performed using modified PCR conditions (final concentration of  
78 forward primer 100 nmol/l; reverse primer 800 nmol/l; cycling conditions: 10 min initial  
79 denaturation at 95°C followed by 40 cycles of 95°C for 1 sec and 65°C for 1 min). Copy  
80 numbers of cccDNA molecules were normalized to human mitochondrial DNA present in the  
81 undigested column-purified samples by using human-specific primers and probe for the  
82 mitochondrial gene ND2 (assay ID #Hs02596874\_g1). Southern blot analysis was performed  
83 as previously described(3) with minor modifications. Because liver samples from chimeric mice  
84 harbor varying amounts of human hepatocytes, samples were normalized to the amount of  
85 human mitochondrial DNA measured by qPCR in undigested samples (see above) making  
86 sure that equal amounts of DNA originating from human hepatocytes were loaded in every  
87 lane. Samples were mixed with loading dye (New England Biolabs, Ipswich, Massachusetts,  
88 USA) and loaded onto a 1.2% TAE agarose gel together with a 1 Kb DNA ladder (Thermo  
89 Fisher). After gel electrophoresis at 25 V for 21 h, the gel was treated as follows: 10 min in  
90 depurination buffer (0.2N HCl), 1 h in denaturing buffer (0.5N NaOH/1.5M NaCl), 1 h in  
91 neutralization buffer (1.5M NaCl/1M Tris-HCl pH 7.4), 30 min in 20xSSC buffer (3M NaCl/0.3M  
92 sodium citrate) gently shaking at room temperature. The DNA was blotted onto a Nytran SPC  
93 membrane using the TurboBlotter kit (GE Healthcare, Chicago, Illinois, United States). After  
94 transfer, the membrane was rinsed in 2xSSC and UV-crosslinked at 254 nm and 120 mJ/cm<sup>2</sup>.  
95 HBV DNA was detected with the help of branched DNA technology using the QuantiGene  
96 Singleplex assay (Thermo Fisher). Briefly, the membrane was blocked in hybridization buffer  
97 (30 min at 55°C), then hybridized with HBV DNA probes (assay ID #VF1-12525) overnight at  
98 55°C. The following day, the membrane was successively incubated with the pre-amplifier (30  
99 min at 55°C), amplifier (1 h at 55°C) and label probe (1 h at 50°C) before the signal was  
100 detected with CDP-STAR Detection Reagent (Roche, Basel, Switzerland) in a Fusion FX  
101 (Vilber Lourmat, Eberhardzell, Germany). Densitometric analysis was used to quantify the  
102 signal intensity of the cccDNA band (2.1kb) after rolling ball background subtraction in the  
103 Fusion FX software.

104

105 **Gene expression analysis.** Expression levels of human genes were quantified by qPCR as  
106 previously described(4). Briefly, liver RNA was reverse transcribed with the Transcriptor First  
107 Strand cDNA Synthesis Kit (Roche) using oligo-dT primer and subjected to qPCR using the  
108 following human-specific primers not cross-reacting with murine sequences: SMC5 (TaqMan®  
109 Gene Expression assay ID #Hs00390892\_m1), SMC6 (#Hs01093459\_m1), ISG15  
110 (#Hs00192713\_m1), OAS1 (#Hs00973637\_m1), HLA-A (#Hs01058806\_g1), STAT1  
111 (#Hs01013989\_m1). Expression levels were normalized to the mean of two human

112 housekeeping genes (GAPDH and RPL30) as described above. Three different human  
113 hepatocyte donors were used for the engraftment of liver chimeric mice in this study. Since  
114 basal gene expression levels may vary from donor to donor for some genes, all treated mice  
115 were normalized to the expression levels of untreated control mice repopulated with the  
116 respective hepatocyte donor.

117

118 **Chromatin Immunoprecipitation (ChIP).** ChIP qPCR assays were performed as described  
119 previously(5) and adapted to the use of liver tissue. Briefly, liver tissues were pulverized in  
120 liquid nitrogen and resuspended in PBS containing proteases inhibitors with subsequent  
121 homogenization by douncing with loose pestles. Samples were fixed under constant rotation  
122 in methanol-free 1% formaldehyde for 10 min and quenched with 125 mM glycine for 5 min.  
123 Nuclei were isolated before chromatin extraction and chromatin was fragmented by sonication  
124 (Bioruptor Plus, Diagenode, Seraing Belgium), aliquoted and kept frozen at -80 °C until further  
125 use. Chromatin was precipitated with 3 µl anti-NSE4 (#AP9907-a, Abgent, San Diego, USA)  
126 or 1 µl unspecific rabbit IgG using the MAGnify™ Chromatin Immunoprecipitation System  
127 (Thermo Fisher) according to the manufacturer's instructions. cccDNA in the input and  
128 precipitates was amplified by qPCR using TaqMan primer and probe as described above.

129

130 **Immunofluorescence.** Immunofluorescence stainings were performed on 12-µm cryostat  
131 liver sections. Human SMC6 was co-stained with HBcAg on liver sections after fixation in 4%  
132 paraformaldehyde using a polyclonal rabbit anti-SMC6 antibody (#HPA042733, Sigma  
133 Aldrich), which does not cross-react with mouse Smc6, and a monoclonal mouse anti-HBcAg  
134 antibody (clone 10E11, # ab8639, Abcam, Cambridge, United Kingdom). Specific signals were  
135 visualized with Alexa Fluor 488 or 555 labeled secondary antibodies (Invitrogen, Darmstadt,  
136 Germany). Nuclear staining was achieved by Hoechst 33258 (Invitrogen, Eugene, USA).  
137 Stained sections were analyzed by fluorescence microscopy (BZ-X710, Keyence, Osaka,  
138 Japan) using the same settings for all mice per staining.

139

140 **Statistical Analysis.** Reductions from baseline were calculated from individual mice and  
141 compared between treated and untreated groups at the end of treatment using the Mann-  
142 Whitney test and GraphPad Prism 6. P-values <0.05 were considered statistically significant.

143

144 **Supplementary figures**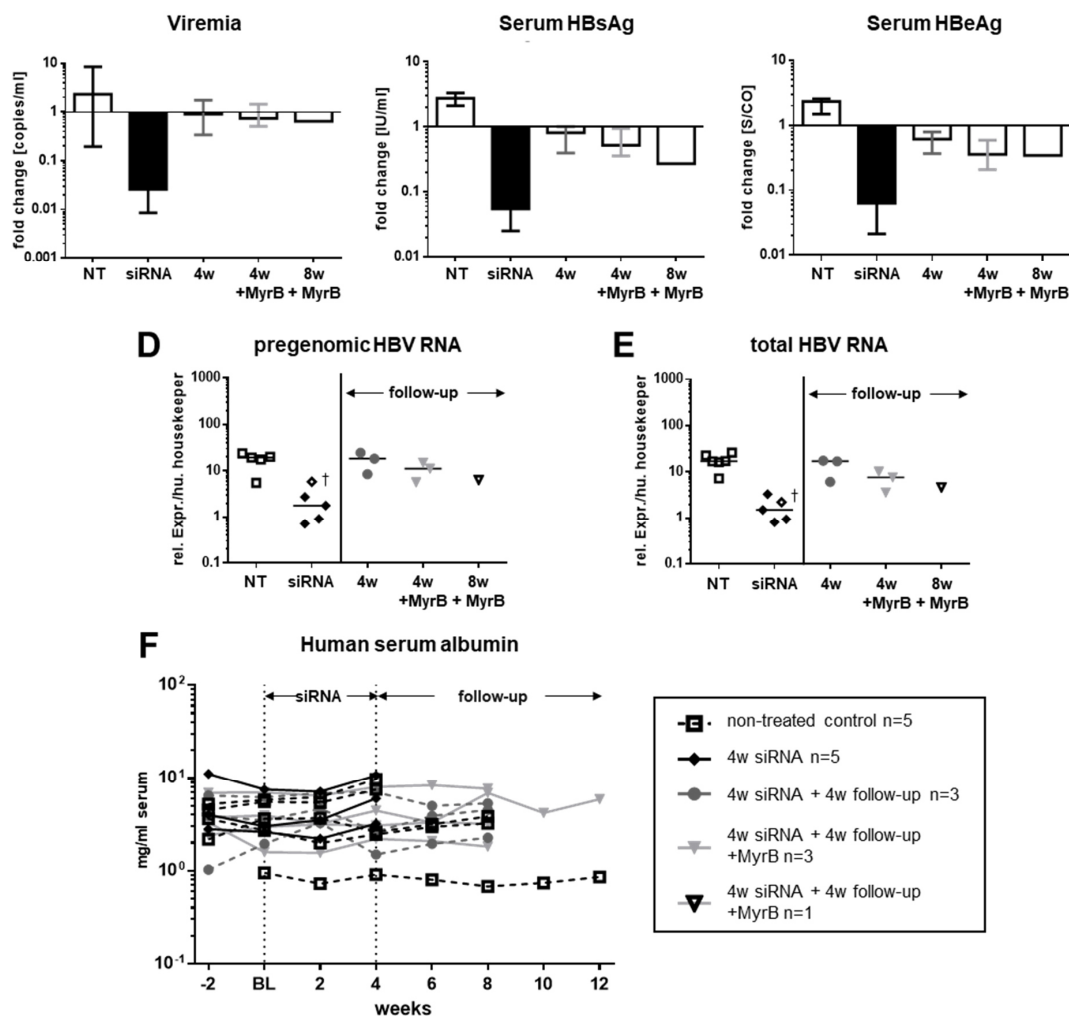

145

146 **Suppl. Fig. 1: Viral DNA, RNA and protein levels are reduced but human serum albumin**  
 147 **levels do not change upon siRNA treatment**

148 Mice were sacrificed at the indicated time points and changes of serum HBV DNA levels (A),  
 149 HBsAg (B) and HBeAg (C) were determined by qPCR or ELISA and depicted as bar graphs  
 150 showing the median and range. Pregenomic HBV RNA (D) and total HBV RNA levels (E)  
 151 normalized to human housekeeping genes were determined by qPCR. Each dot represents a  
 152 single mouse; horizontal lines depict the median. (F) Longitudinal analysis of human serum  
 153 albumin levels as determined by ELISA in mouse serum. Mice were treated as indicated below  
 154 the graph and blood was drawn every other week. Every line represents one mouse. NT, non-  
 155 treated.

156

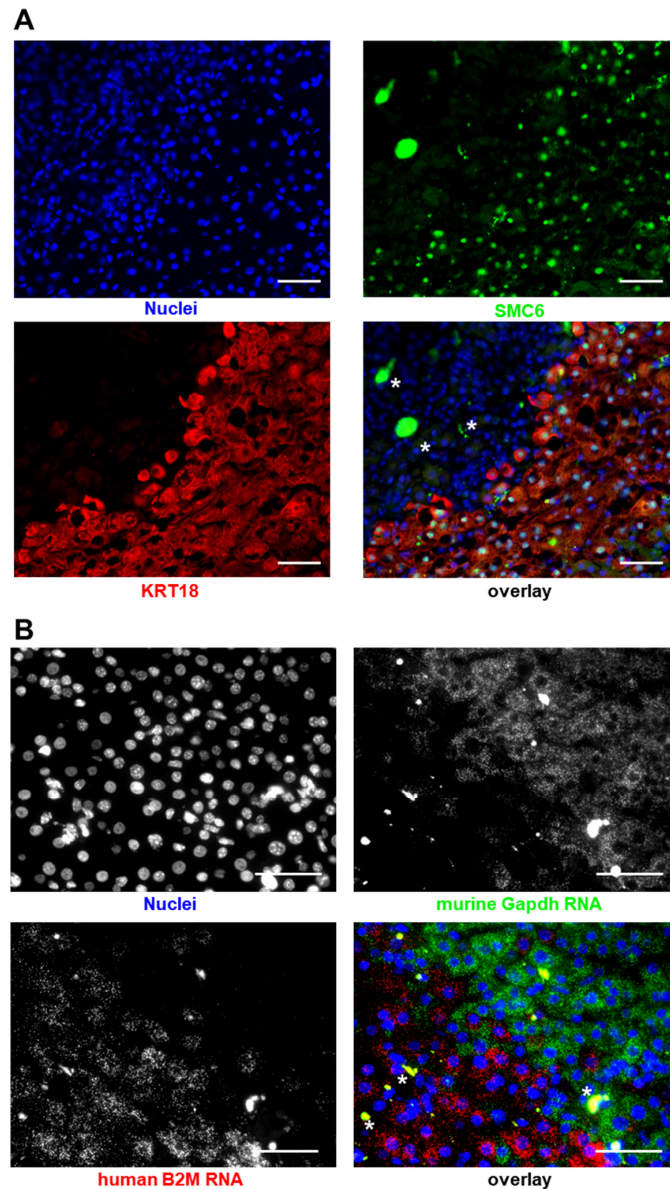

157

158

**Suppl. Fig. 2: SMC6 protein and B2M RNA staining are human-specific.**

159

(A) Immunofluorescence co-staining for SMC6 (green) and cytokerin 18 (KRT18) (red) in cryopreserved liver sections of an untreated non-infected USG mouse. KRT18 was used as a specific marker for human hepatocytes. Nuclei were stained with Hoechst 33258. (B) RNA-ISH co-staining for murine Gapdh transcripts (green) and human B2M transcripts (red) in cryopreserved liver sections of an untreated HBV-infected USG mouse. Nuclei were stained with DAPI. Scale bar 50 μm. \* indicates autofluorescent phagocytic remnants.

162

163

164

165

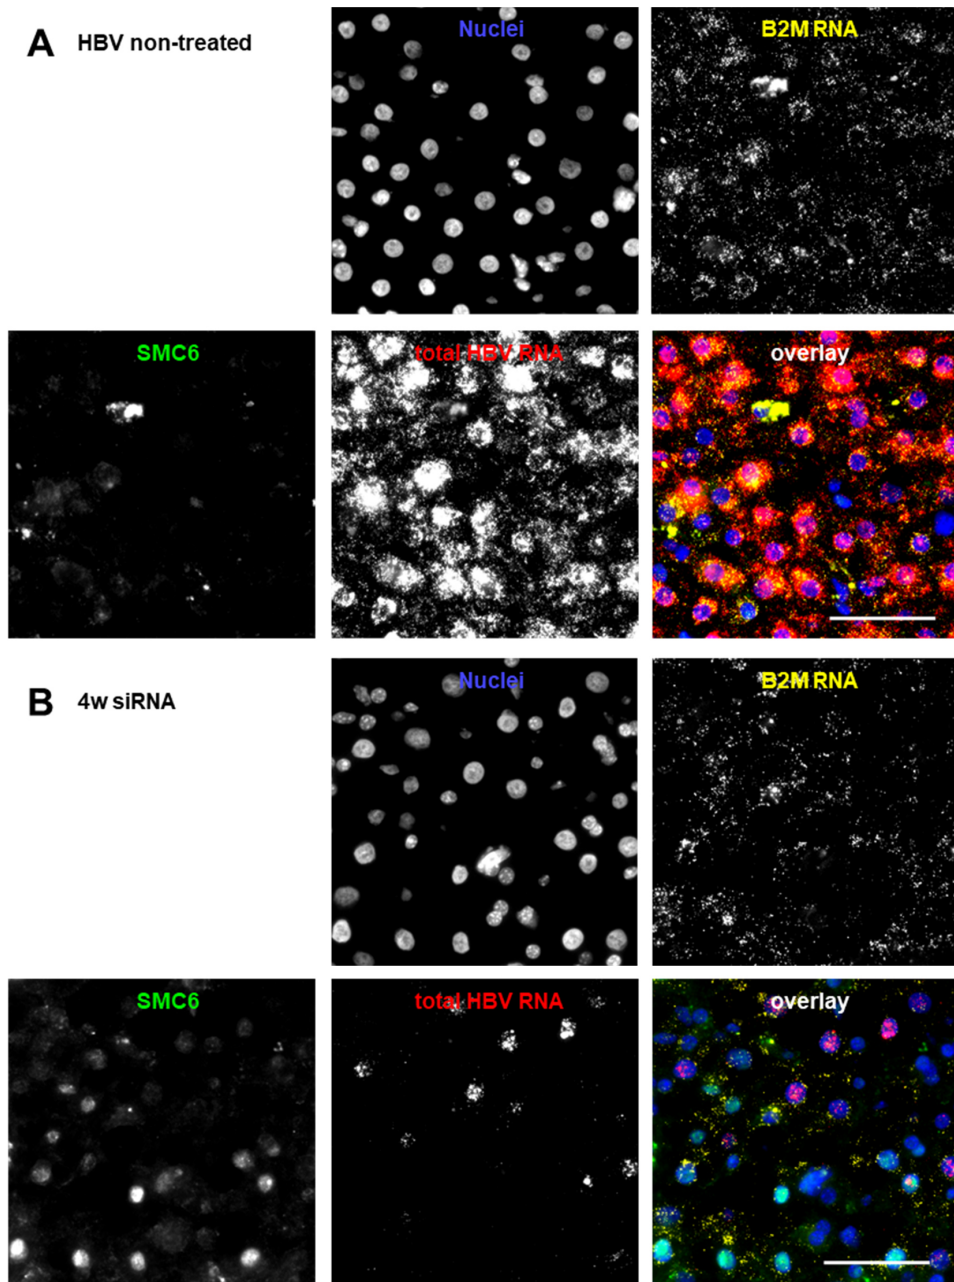

166

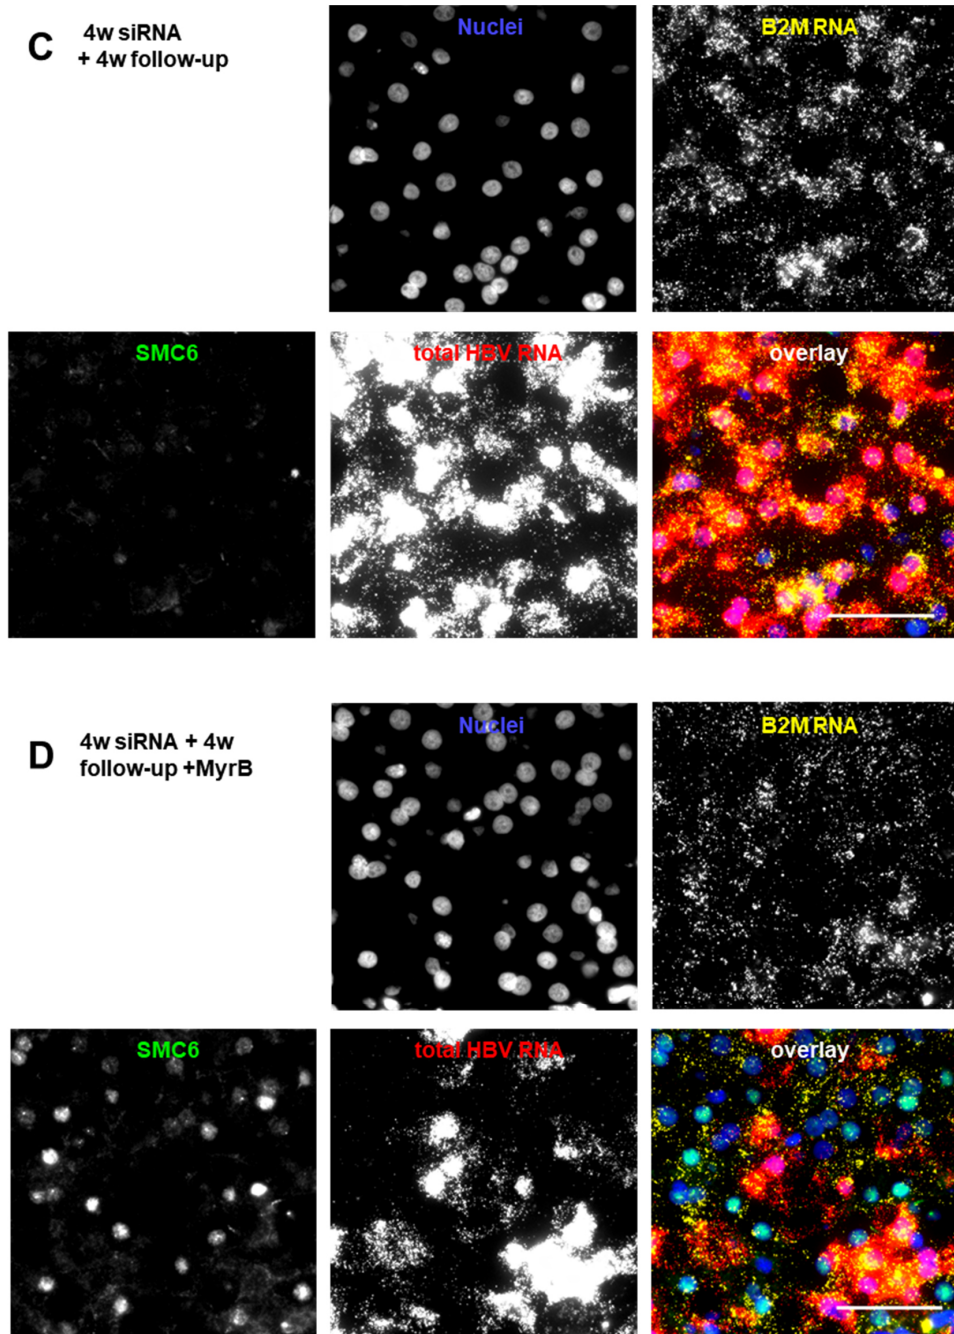

167  
168  
169



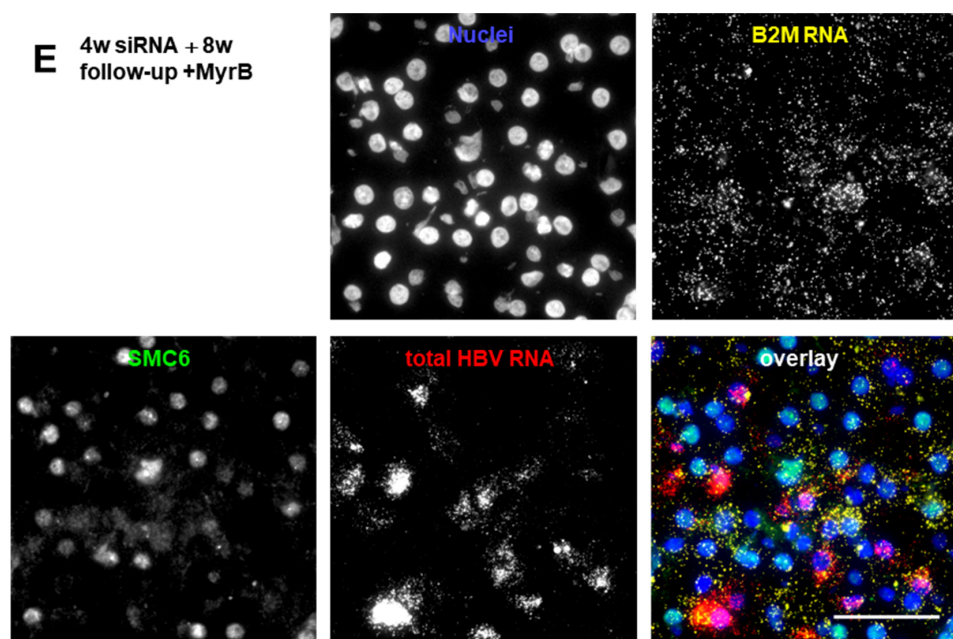

170

171

172 **Suppl. Fig. 3: siRNA treatment leads to the reappearance of SMC6 in hepatocytes**  
173 **negative for signs of active HBV replication.**

174 (A-E) Single channel photographs and overlays of RNA in situ hybridization for total HBV RNA  
175 combined with immunofluorescence staining for SMC6 protein. Shown are the same  
176 photographs as in figure 2 (representative pictures of one mouse from every treatment group  
177 as indicated at the left-hand side). Overlay pictures show nuclei stained with DAPI in blue, B2M  
178 RNA as a marker for human hepatocytes in aqua, SMC6 protein in green and total HBV RNA  
179 in red. Scale bar 50  $\mu$ m.

180

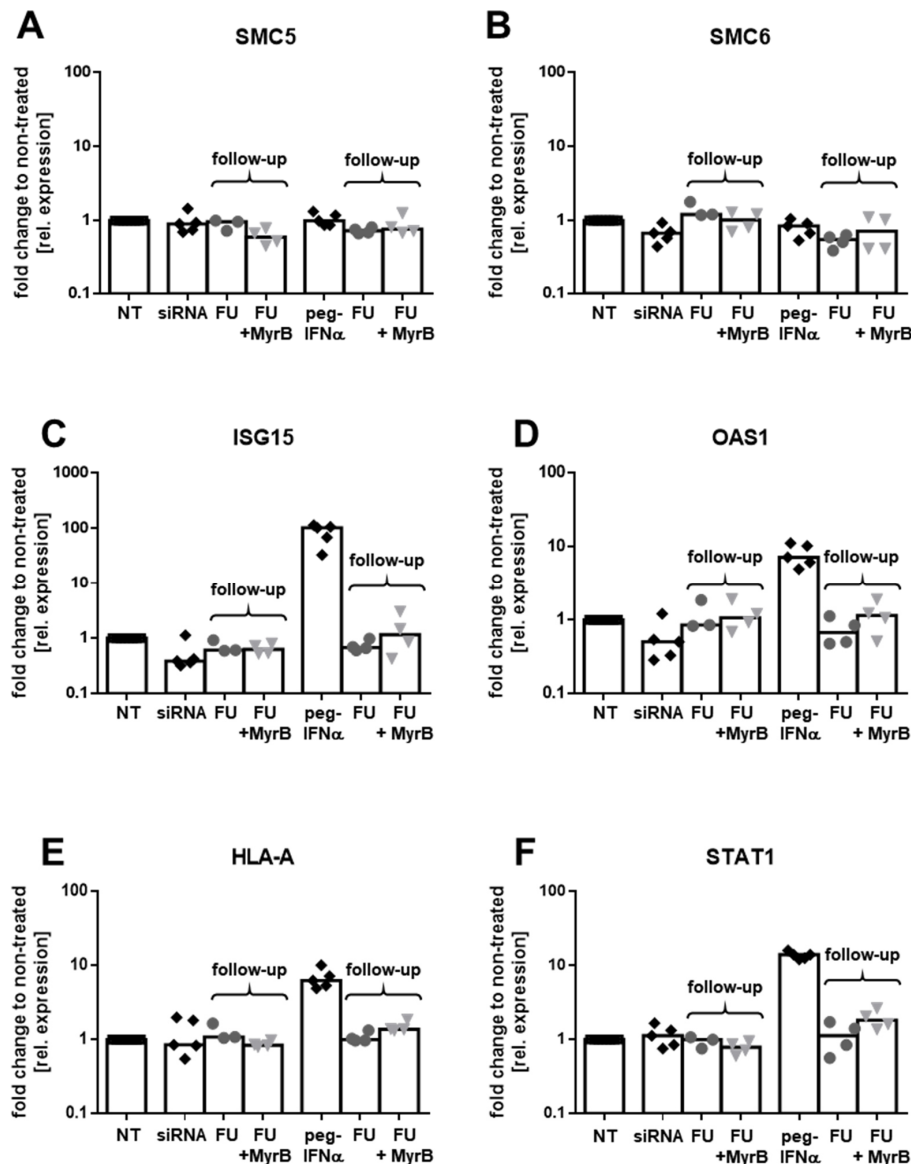

181

182 **Suppl. Fig. 4: Interferon-stimulated genes are induced upon peg-IFN $\alpha$  but not siRNA**  
 183 **treatment while SMC5 and SMC6 mRNA levels remain stable across all treatments.**

184 mRNA levels of SMC5 and SMC6 and classical human ISGs were determined by qPCR in all  
 185 mice included in this manuscript using human-specific TaqMan primer and probe sets. The  
 186 expression levels of SMC5 (A), SMC6 (B), ISG15 (C), OAS1 (D), HLA-A (E) and STAT1 (F)  
 187 are shown as dot blots where bars depict the median and every dot represents a single mouse.  
 188 Expression levels are normalized to the mean of two human housekeeping genes. These  
 189 relative expression levels are then normalized to expression levels in untreated control mice  
 190 repopulated with hepatocytes from the same human donor. NT, non-treated; FU, follow-up.

191

10

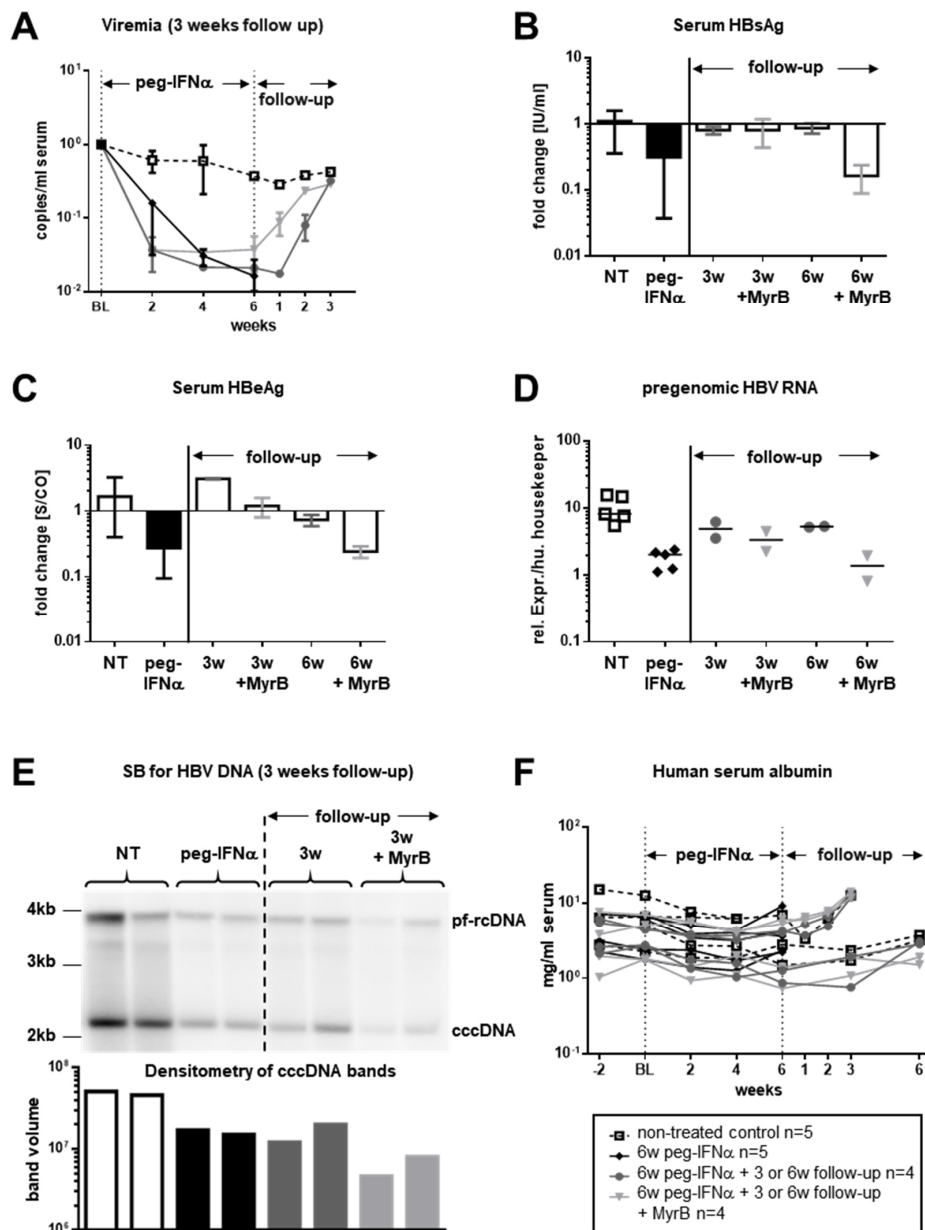

192

193

194 **Suppl. Fig. 5: Viral markers including cccDNA are reduced upon peg-IFN $\alpha$  treatment**  
 195 **without affecting human serum albumin levels**

196 HBV-infected USG mice were treated with peg-IFN $\alpha$  as indicated in two independent  
 197 experiments. (A) Blood was drawn every other week and viral titers were determined by qPCR.  
 198 The line graph shows mice from experiment 1. Lines depict the median and error bars the  
 199 range. (B, C) Changes of serum HBsAg (B) and HBeAg (C) from both experiments were  
 200 determined by ELISA and depicted as bar graphs showing the median and range. (D) Mice  
 201 were sacrificed at the indicated time points and pregenomic HBV RNA normalized to human

11

202 housekeeping genes was determined by qPCR. Each dot represents a single mouse;  
203 horizontal lines depict the median. (E) Liver DNA extracts (Epicentre-base extraction without  
204 proteinase K) were subjected to Southern blot. DNA amounts were normalized to human  
205 mitochondrial DNA and digested with PSD before loading. The bar graph below shows the  
206 densitometry analysis of the cccDNA band. The blot shows mice from experiment 1. pf-rcDNA,  
207 protein-free rcDNA; NT, not treated. (F) Longitudinal analysis of human serum albumin levels  
208 as determined by ELISA in mouse serum. Every line represents one mouse.  
209

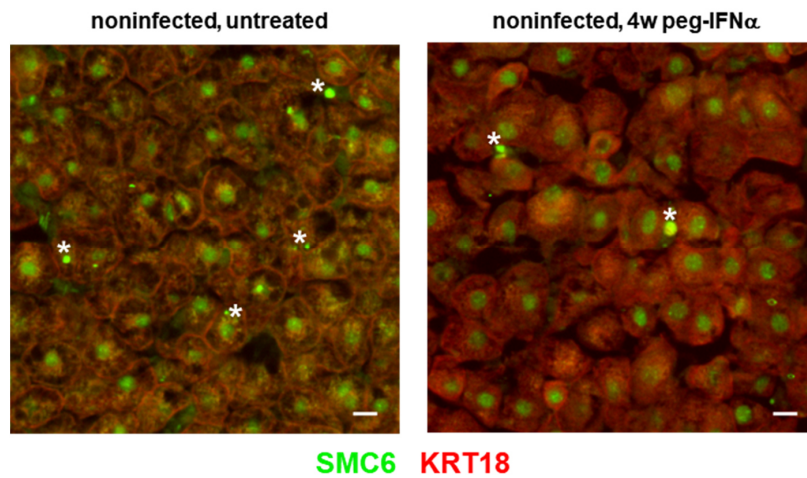

210

211 **Suppl. Fig. 6: SMC6 protein levels in human hepatocytes are not affected by peg-**  
212 **IFN $\alpha$  treatment**

213 Immunofluorescence co-staining for SMC6 (green) and cytokeratin 18 (KRT18) (red) in  
214 cryopreserved liver sections of an untreated non-infected USG mouse (A) and a non-infected  
215 USG mouse treated for four weeks with peg-IFN $\alpha$  (B). KRT18 was used as a specific marker  
216 for human hepatocytes. Scale bar 10  $\mu$ m. \* indicates autofluorescent phagocytic remnants.

217

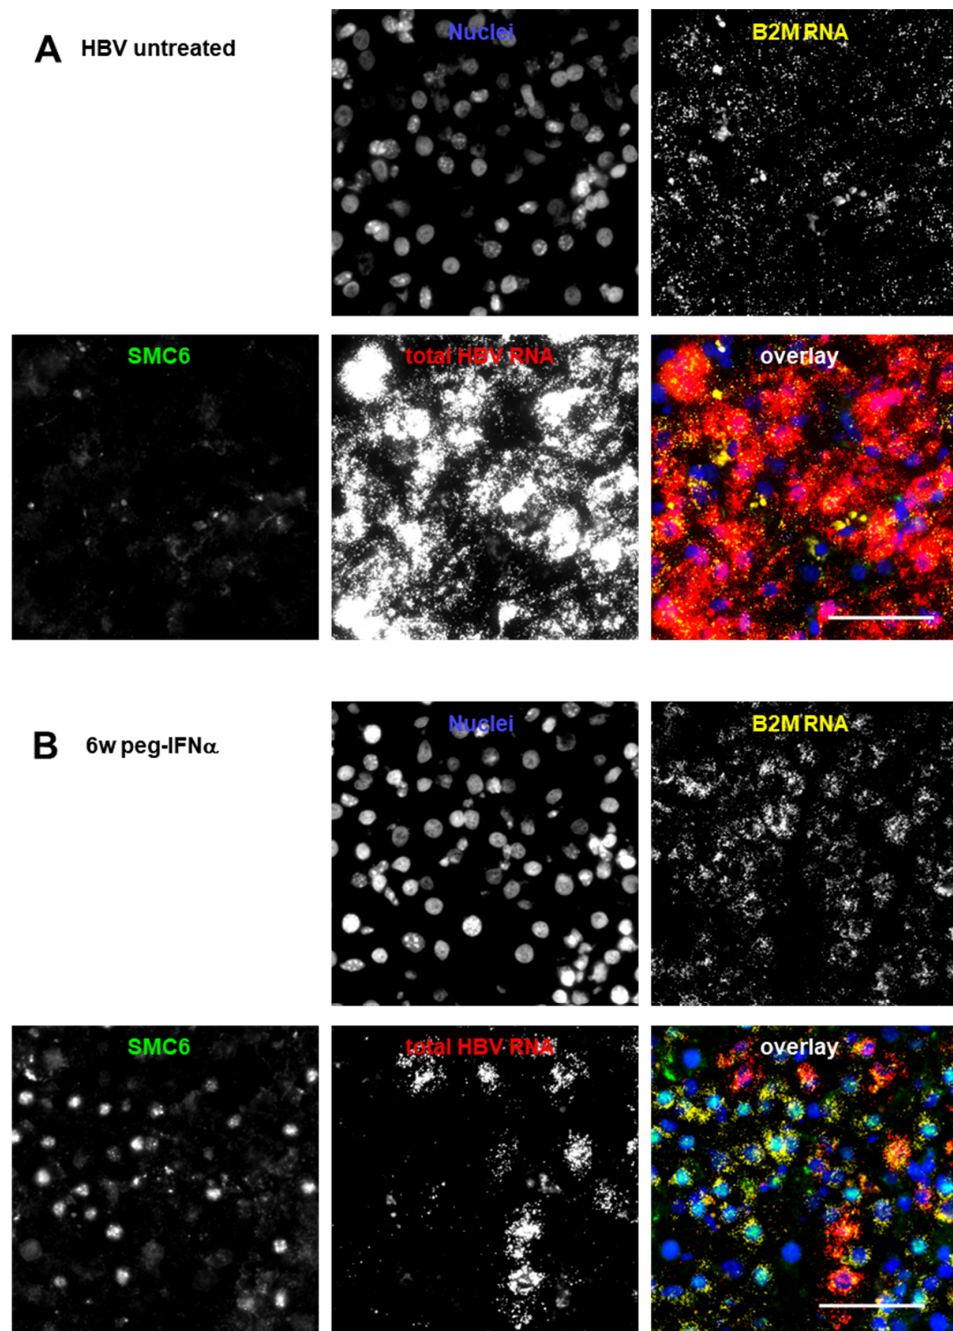

218

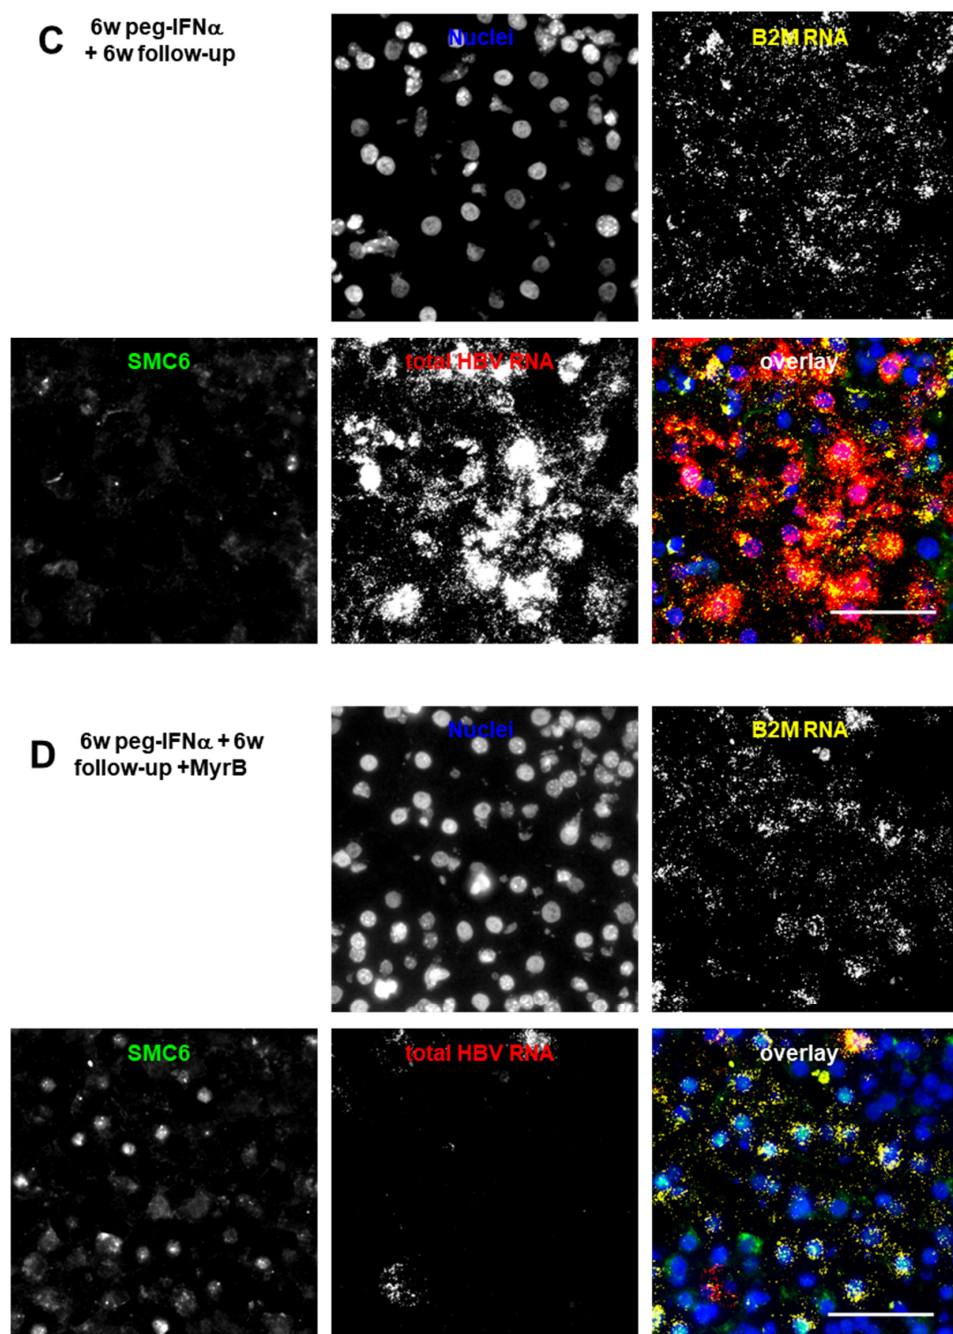

219

220 **Suppl. Fig. 7: Peg-IFN $\alpha$  treatment leads to the reappearance of the SMC5/6 complex in**  
 221 **hepatocytes negative for signs of active replication.**

222 (A-D) Single channel photographs and overlays of RNA in situ hybridization for total HBV  
 223 RNA combined with immunofluorescence staining for SMC6 protein. Shown are the same  
 224 photographs as in figure 4 (representative pictures of one mouse from every treatment group  
 225 as indicated at the left-hand side). Overlay pictures show nuclei stained with DAPI in blue,  
 226 B2M RNA as a marker for human hepatocytes in aqua, SMC6 protein in green and total HBV  
 227 RNA in red. Scale bar 50  $\mu$ m.

15

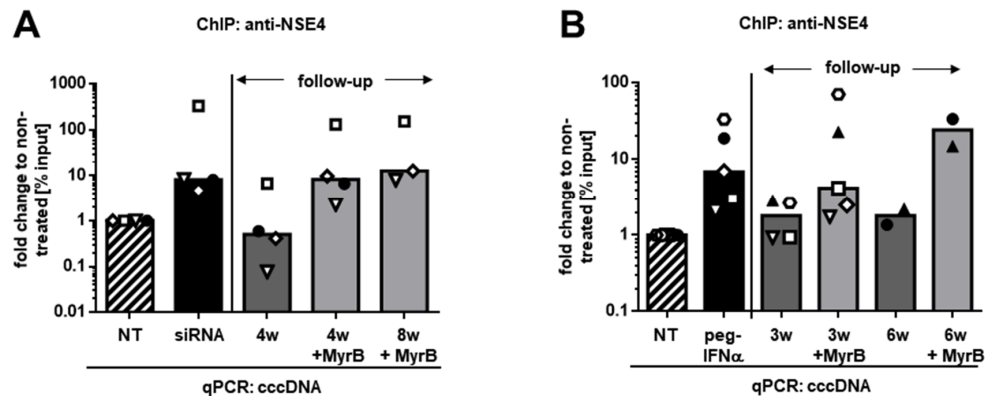

228

229

230 **Suppl. Fig. 8: Both siRNA and peg-IFN $\alpha$  treatment recruit the SMC5/6 complex to the**  
 231 **cccDNA.** (A, B) Chromatin immunoprecipitation assays were performed in two mice from every  
 232 treatment group following siRNA (A) and peg-IFN $\alpha$  (B) treatment. Chromatin from liver tissue  
 233 was precipitated with anti-NSE4 antibody and analyzed by cccDNA-selective qPCR. In one of  
 234 the two mice from every group, the assay was performed in triplicates or quadruplicates, i.e.  
 235 in separate chromatin preparations with distinct liver pieces. The mean of these measurements  
 236 is also shown in figure 5C and D. Open symbols represent these replicate measurements and  
 237 are shown alongside with the measurement from the second mouse (filled symbols) as shown  
 238 in figure 5C and D. The form of the symbols indicates the measurements that were derived  
 239 from ChIP assays performed in parallel, bars the median. NT, not treated.

240

241

242

243

244

245

246

247

248

249

250

251

252



253

254

255

256

257 **Supplementary references**

258

259 1. Allweiss L, Volz T, Lutgehetmann M, Giersch K, Bornscheuer T, Lohse AW, et al. Immune cell  
260 responses are not required to induce substantial hepatitis B virus antigen decline during pegylated  
261 interferon-alpha administration. *J Hepatol.* 2014;60(3):500-7.

262 2. Malmstrom S, Larsson SB, Hannoun C, Lindh M. Hepatitis B viral DNA decline at loss of HBeAg  
263 is mainly explained by reduced cccDNA load--down-regulated transcription of PgRNA has limited  
264 impact. *PloS one.* 2012;7(7):e36349.

265 3. Niu C, Livingston CM, Li L, Beran RK, Daffis S, Ramakrishnan D, et al. The Smc5/6 Complex  
266 Restricts HBV when Localized to ND10 without Inducing an Innate Immune Response and Is  
267 Counteracted by the HBV X Protein Shortly after Infection. *PloS one.* 2017;12(1):e0169648.

268 4. Oehler N, Volz T, Bhadra OD, Kah J, Allweiss L, Giersch K, et al. Binding of hepatitis B virus to  
269 its cellular receptor alters the expression profile of genes of bile acid metabolism. *Hepatology.*  
270 2014;60(5):1483-93.

271 5. Gunther T, Theiss JM, Fischer N, Grundhoff A. Investigation of Viral and Host Chromatin by  
272 ChIP-PCR or ChIP-Seq Analysis. *Current protocols in microbiology.* 2016;40:1E 10 1-21.
